# Supplementary material for: Iron-exchanged high-silica LTA zeolites as hydrothermally stable NH3-SCR catalysts
Source: Royal Society of Chemistry journal article supplement (doi:10.1039/c9re00007k), 2019-01-01
Supplement: c9re00007k1.pdf [file c9re00007k1.pdf]

**Electronic Supporting Information**  
**for**  
**“Iron-exchanged high-silica LTA zeolite as hydrothermally stable NH<sub>3</sub>-SCR**  
**catalysts”**

Taekyung Ryu, Yonjoo Kang, In-Sik Nam and Suk Bong Hong\*

*Center for Ordered Nanoporous Materials Synthesis, Division of Environmental Science and  
Engineering, POSTECH, Pohang 37673, Korea*

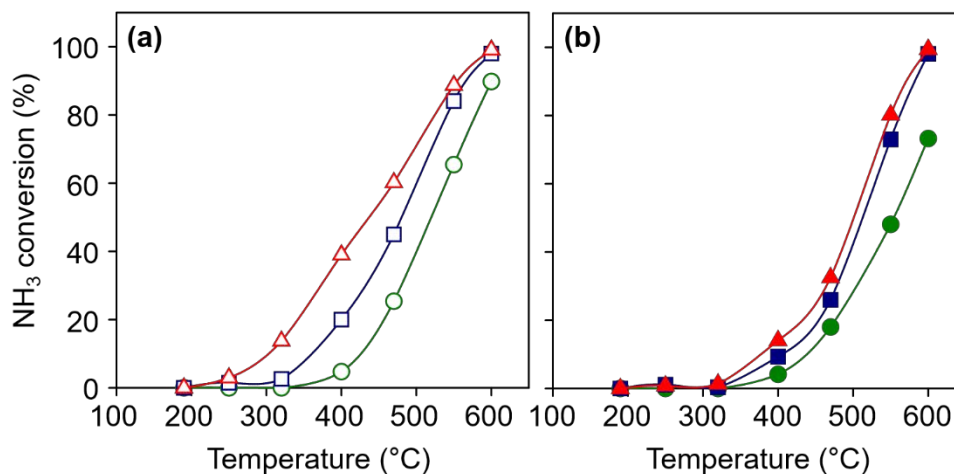

**Fig. S1**  $\text{NH}_3$  conversion as a function of temperature in the  $\text{NH}_3$  oxidation reaction over the fresh (a) Fe-SSZ-13 and (b) Fe-LTA catalysts with the same Si/Al ratio but different Fe/Al ratios: Fe-SSZ-13-16-0.19, ○; Fe-SSZ-13-16-0.26, □; Fe-SSZ-13-16-0.35, △; Fe-LTA-16-0.18, ●; Fe-LTA-16-0.29, ■; Fe-LTA-16-0.37, ▲. The feed contains 500 ppm  $\text{NH}_3$ , 5%  $\text{O}_2$  and 10%  $\text{H}_2\text{O}$ , balanced with  $\text{N}_2$ , at 100,000  $\text{h}^{-1}$  GHSV. The last two numbers in the catalyst identification indicate the Si/Al and Fe/Al ratios of each catalysts, respectively.

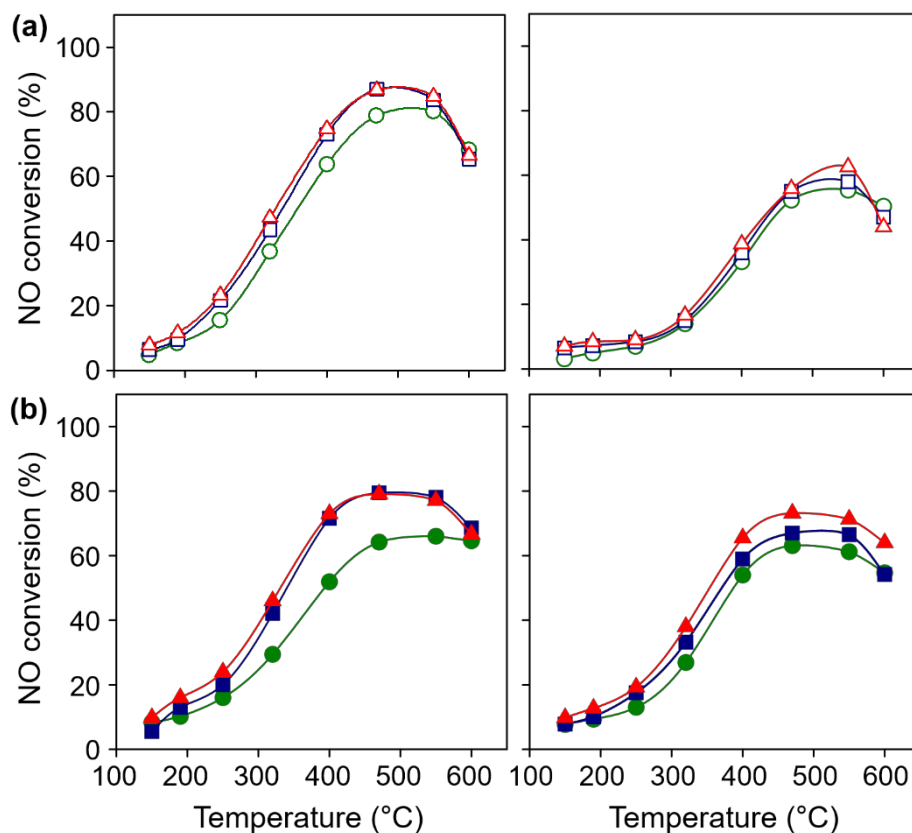

**Fig. S2** NO conversion as a function of temperature in the  $\text{NH}_3$ -SCR reaction over the (left) 750 °C- and (right) 850 °C-aged forms of (a) Fe-SSZ-13 and (b) Fe-LTA catalysts with the same Si/Al ratio but different Fe/Al ratios: Fe-SSZ-13-16-0.19,  $\circ$ ; Fe-SSZ-13-16-0.26,  $\square$ ; Fe-SSZ-13-16-0.35,  $\triangle$ ; Fe-LTA-16-0.18,  $\bullet$ ; Fe-LTA-16-0.29,  $\blacksquare$ ; Fe-LTA-16-0.37,  $\blacktriangle$ . The feed contains 500 ppm  $\text{NH}_3$ , 500 ppm NO, 5%  $\text{O}_2$  and 10%  $\text{H}_2\text{O}$ , balanced with  $\text{N}_2$ , at 100,000  $\text{h}^{-1}$  GHSV. Hydrothermal aging was performed under flowing air containing 10%  $\text{H}_2\text{O}$  at 750 and 850 °C for 24 h, respectively.

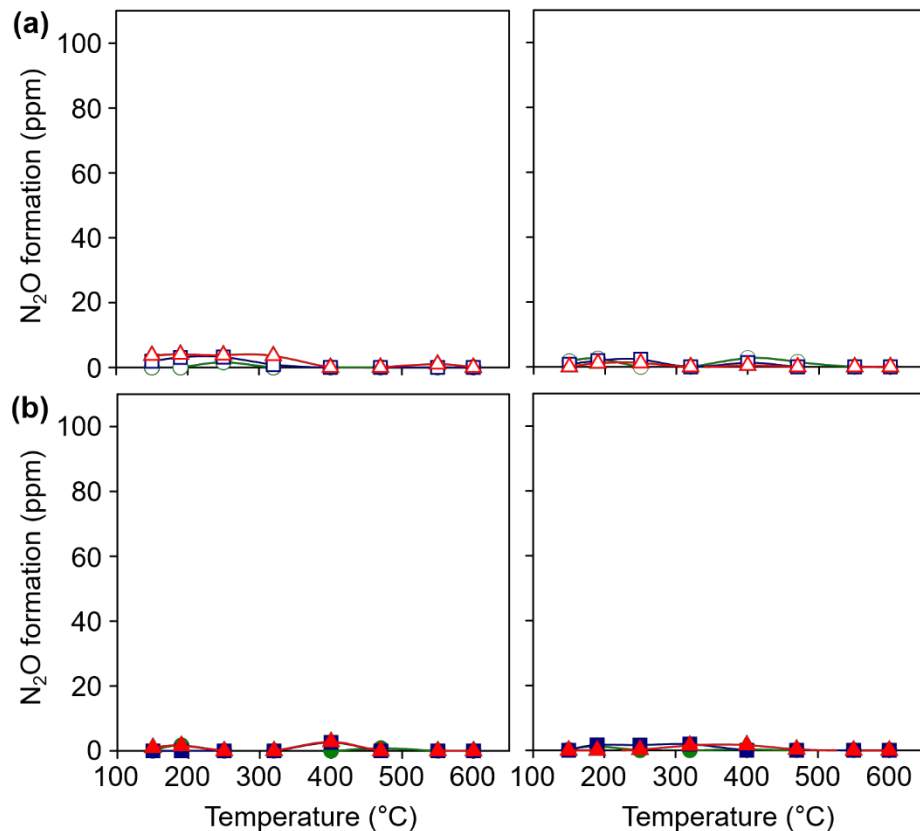

**Fig. S3**  $\text{N}_2\text{O}$  formation as a function of temperature in the  $\text{NH}_3$ -SCR reaction over the (left) fresh and (right) 900 °C-aged forms of (a) Fe-SSZ-13 and (b) Fe-LTA catalysts with the same Si/Al ratio but different Fe/Al ratios: Fe-SSZ-13-16-0.19,  $\circ$ ; Fe-SSZ-13-16-0.26,  $\square$ ; Fe-SSZ-13-16-0.35,  $\triangle$ ; Fe-LTA-16-0.18,  $\bullet$ ; Fe-LTA-16-0.29,  $\blacksquare$ ; Fe-LTA-16-0.37,  $\blacktriangle$ . Hydrothermal aging was performed under flowing air containing 10%  $\text{H}_2\text{O}$  at 900 °C for 12 h. The feed composition is the same as that given in Fig. S2.

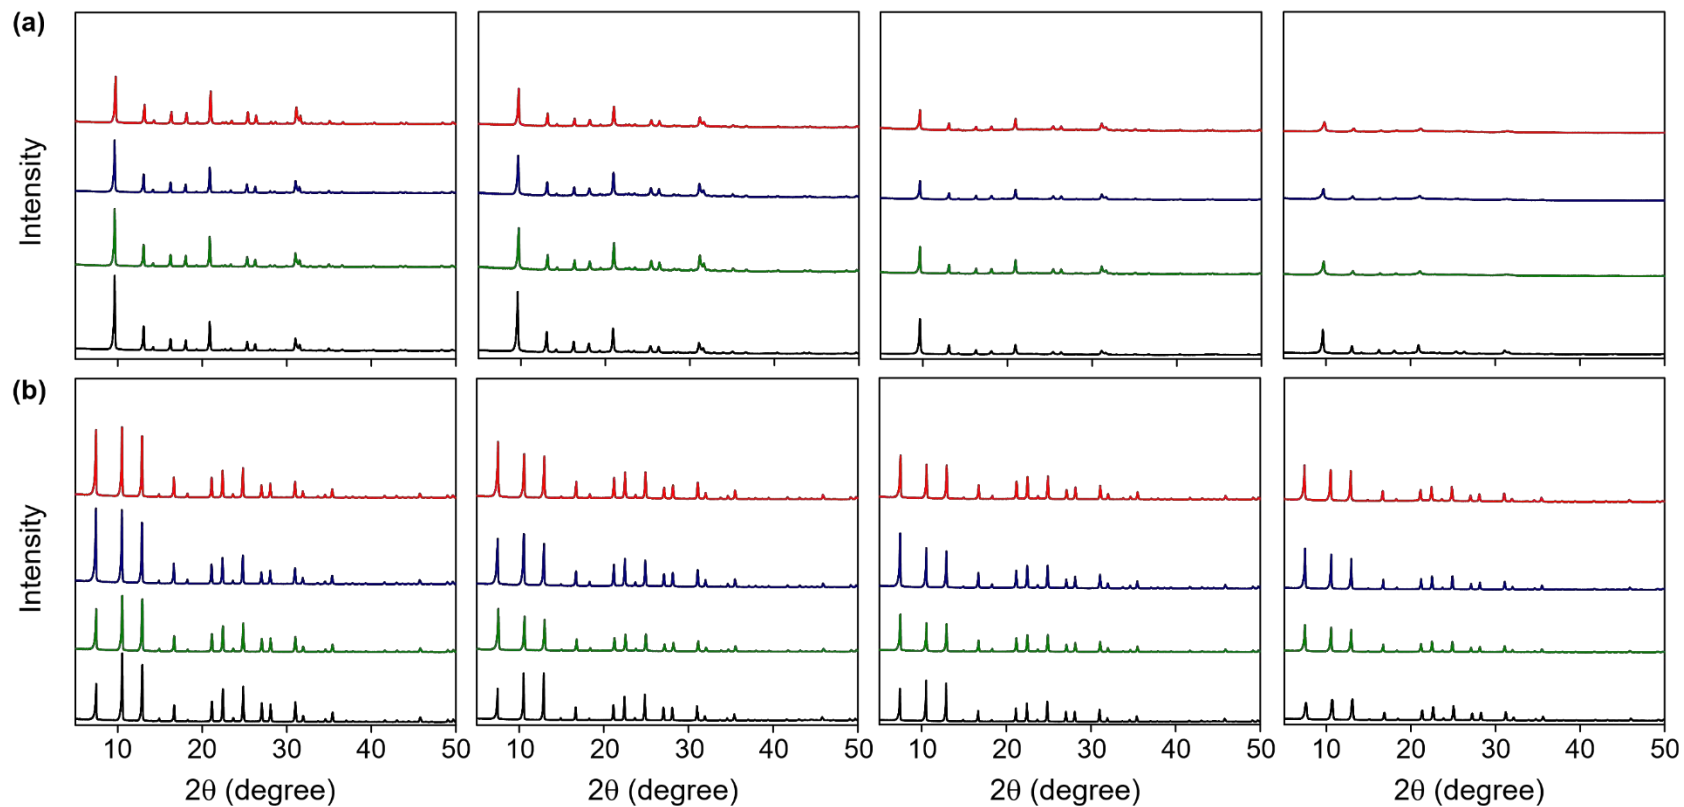

**Fig. S4** Powder X-ray patterns of the (from left to right) fresh, 750 °C-, 850 °C-, and 900 °C-aged forms of (a, from bottom to top) Fe-SSZ-13-16-0 (black), Fe-SSZ-13-16-0.19 (green), Fe-SSZ-13-16-0.26 (navy), and Fe-SSZ-13-16-0.35 (red) and (b, from bottom to top) Fe-LTA-16-0 (black), Fe-LTA-16-0.18 (green), Fe-LTA-16-0.29 (navy), and Fe-LTA-16-0.37 (red) catalysts. Hydrothermal aging was conducted under flowing air containing 10% H<sub>2</sub>O at 750 and 850 °C for 24 h and at 900 °C for 12 h, respectively.

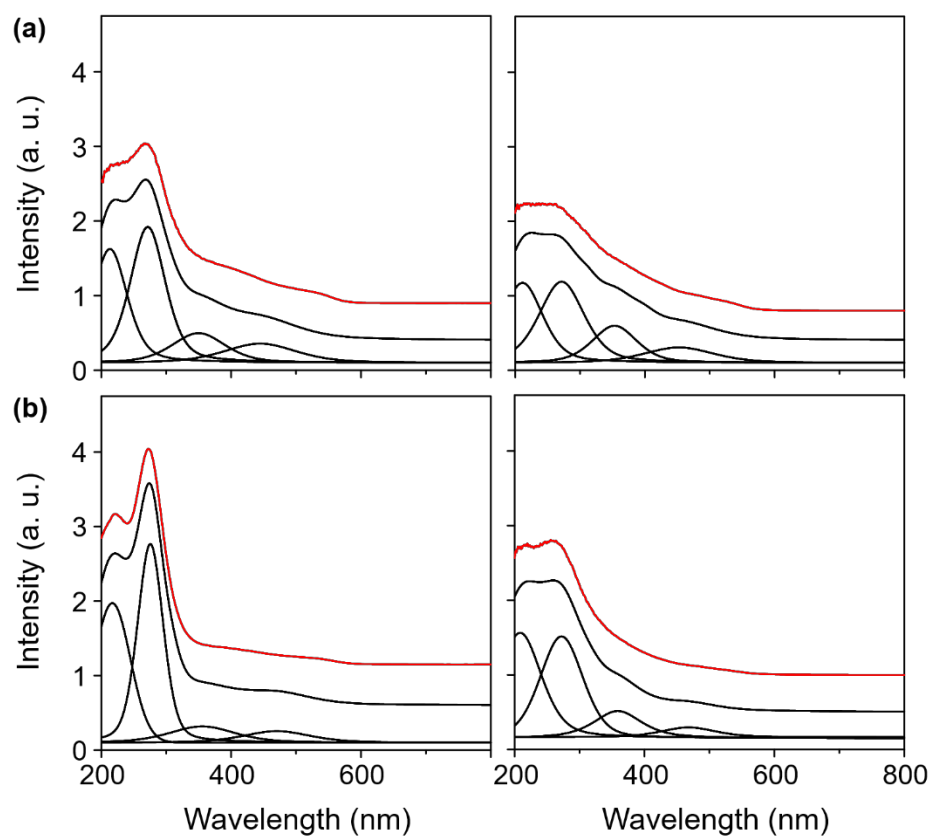

**Fig. S5** UV-vis spectra of the (left) fresh and (right) 900 °C-aged forms of (a) Fe-SSZ-13-16-0.35 and (b) Fe-LTA-16-0.37 catalysts: experimental (top); simulated (middle); deconvoluted components (bottom). The hydrothermal aging conditions are the same as that given in Fig. S3.

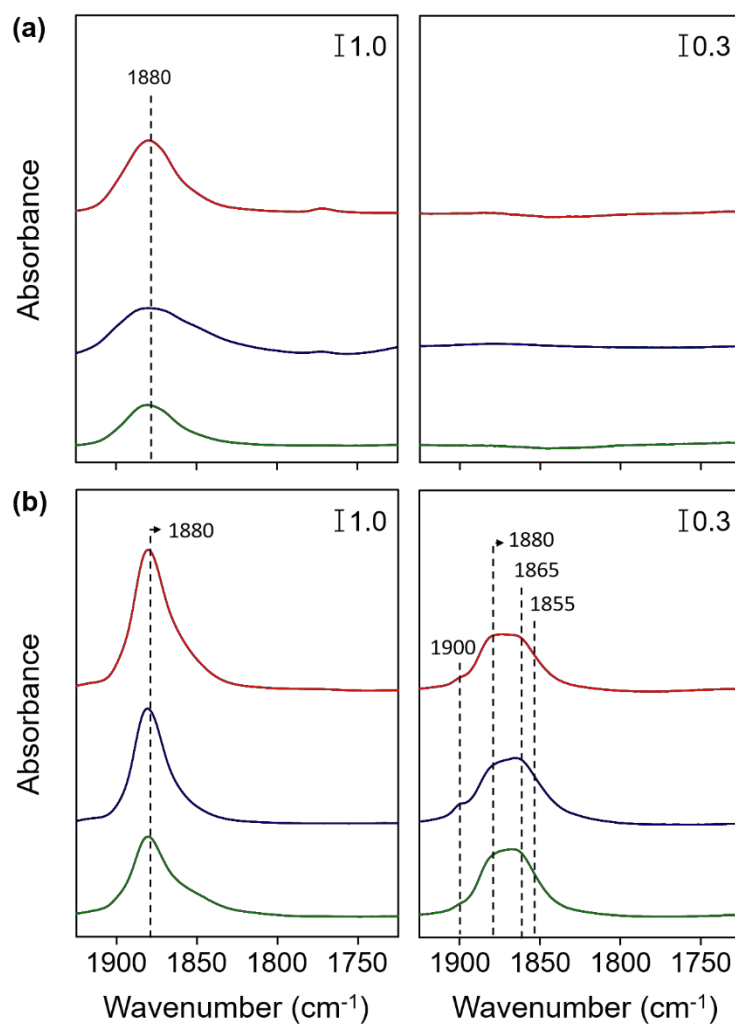

**Fig. S6** Difference IR spectra of adsorbed NO on the (left) fresh and (right) 900 °C-aged forms of (a, from bottom to top) Fe-SSZ-13-16-0.19 (green), Fe-SSZ-13-16-0.26 (navy), and Fe-SSZ-13-16-0.35 (red) and (b, from bottom to top) Fe-LTA-16-0.18 (green), Fe-LTA-16-0.29 (navy), and Fe-LTA-16-0.37 (red) catalysts. All the spectra were collected at room temperature after evacuation under vacuum to a residual pressure of  $10^{-4}$  Pa at the same temperature for 1 h.
